# Supplementary material
Source: publisher figshare collection journal article supplement (https://geolsoc.figshare.com/ndownloader/files/5422115)
Supplement: Supplementary file 1 [file 5422115]

,LamTool-U-Th-Pb            ver: 090128,BLANK CORRECTED INTENSITIES (in V),,,,,,STANDARD CORRECTED RATIOS,,,,,,,,,,,,,
,File name,204Pb,206Pb,207Pb,208Pb,232Th,238U,"207Pb
235U",2RSE (%),"206Pb
238U",2RSE (%),Rho,"207Pb
206Pb",2RSE (%),"208Pb
206Pb",2RSE (%),"208Pb
232Th",2RSE (%),"232Th
238U",2RSE (%),
(a),080528_FK13_01_a,#DIV/0!,1.1E-04,6.3E-06,1.1E-04,1.7E-02,1.3E-02,0.0535,23.00,0.0074,7.02,0.15,0.0529,19.72,0.994,0.39,0.002,34.44,1.286,1.51,
(b),080528_FK13_06_a,#DIV/0!,1.2E-04,5.5E-06,1.2E-04,1.8E-02,1.4E-02,0.0442,27.11,0.0071,7.78,0.14,0.0455,28.63,1.005,0.29,0.001,35.33,1.289,2.11,
(c),080528_FK13_07_a,#DIV/0!,1.4E-04,6.4E-06,1.4E-04,2.4E-02,1.6E-02,0.0450,21.96,0.0077,11.20,0.25,0.0426,22.90,0.988,0.56,0.001,30.34,1.487,1.25,
(d),080528_FK13_08_b,#DIV/0!,4.3E-05,3.2E-06,4.3E-05,7.4E-03,5.0E-03,0.0541,36.28,0.0070,6.00,0.08,0.0555,35.61,0.995,0.46,0.001,17.53,1.463,1.26,
(e),080528_FK13_147_a,#DIV/0!,1.1E-04,5.6E-06,1.1E-04,1.2E-02,1.3E-02,0.0450,41.44,0.0074,9.99,0.12,0.0460,34.57,0.998,0.51,0.002,16.29,0.959,1.17,
(f),080528_FK13_132_a,#DIV/0!,1.2E-04,6.1E-06,1.2E-04,4.0E-02,1.4E-02,0.0460,16.39,0.0073,9.04,0.28,0.0462,16.12,0.994,0.33,0.001,18.26,2.794,1.23,
(g),080528_FK13_71_a,8.6E-06,1.1E-04,6.0E-06,1.1E-04,1.4E-02,1.2E-02,0.0501,40.41,0.0073,17.76,0.22,0.0503,34.20,1.004,0.45,0.001,40.28,1.093,1.29,
(h),080528_FK13_94_a,#DIV/0!,1.4E-04,6.9E-06,1.4E-04,2.2E-02,1.6E-02,0.0470,35.16,0.0072,12.75,0.18,0.0477,36.29,0.999,0.57,0.001,39.68,1.359,1.35,
(i),080528_FK13_35_a,#DIV/0!,1.9E-04,9.1E-06,1.9E-04,2.1E-02,2.2E-02,0.0440,8.52,0.0070,4.56,0.27,0.0459,7.97,1.005,0.17,0.001,20.26,0.965,1.54,
(j),080528_FK13_24_a,#DIV/0!,1.1E-04,5.6E-06,1.1E-04,1.5E-02,1.3E-02,0.0460,18.00,0.0067,9.79,0.27,0.0485,14.76,1.001,0.26,0.002,14.25,1.143,2.30,
(k),080528_FK13_47_a,#DIV/0!,1.2E-04,6.5E-06,1.2E-04,1.4E-02,1.4E-02,0.0485,16.60,0.0071,10.37,0.31,0.0505,11.35,1.002,0.24,0.001,39.76,1.006,1.48,
(l),080528_FK13_48_a,#DIV/0!,8.8E-05,4.2E-06,8.8E-05,8.3E-03,1.0E-02,0.0417,40.38,0.0070,16.96,0.21,0.0446,23.86,1.004,0.37,0.002,51.35,0.801,1.33,
(m),080528_FK13_110_a,#DIV/0!,1.2E-04,6.9E-06,1.2E-04,1.9E-02,1.4E-02,0.0523,30.04,0.0073,9.86,0.16,0.0523,28.18,1.004,2.14,0.001,33.69,1.329,1.37,
,080528_FK13_02_a,#DIV/0!,1.1E-04,5.3E-06,1.1E-04,1.8E-02,1.2E-02,0.0495,208.84,0.0077,73.98,0.18,0.0462,177.67,0.987,3.49,0.001,72.23,1.533,1.45,
,080528_FK13_04_a,4.6E-06,2.9E-03,1.7E-04,2.9E-03,1.5E-02,2.3E-02,0.8735,6.56,0.1106,6.22,0.47,0.0576,1.58,0.990,0.23,0.033,44.90,0.641,2.10,
,080528_FK13_115_a,3.1E-06,2.6E-04,1.3E-05,2.6E-04,4.3E-02,3.0E-02,0.0460,80.37,0.0073,51.40,0.32,0.0467,26.95,0.994,0.85,0.001,117.93,1.467,1.22,
,080528_FK13_126_a,4.3E-06,8.1E-05,4.9E-06,8.1E-05,1.4E-02,9.4E-03,0.0578,85.24,0.0074,67.52,0.40,0.0562,65.28,0.995,1.78,0.001,150.86,1.548,1.43,
,080528_FK13_145_a,#DIV/0!,9.3E-05,4.3E-06,9.3E-05,1.0E-02,1.1E-02,0.0405,154.28,0.0071,36.13,0.12,0.0413,112.32,0.999,2.51,0.002,309.68,0.959,1.64,
,080528_FK13_150_a,#DIV/0!,4.9E-05,3.0E-06,4.9E-05,6.2E-03,5.7E-03,0.0590,211.73,0.0075,133.83,0.32,0.0559,243.91,0.988,8.46,0.001,255.98,1.090,1.07,
,080528_FK13_158_a,#DIV/0!,4.2E-04,2.6E-05,4.2E-04,3.6E-03,4.0E-03,0.6352,6.20,0.0798,6.77,0.55,0.0574,2.56,1.006,0.20,0.016,6.32,0.919,1.00,
,080528_FK13_25_a,3.8E-06,5.6E-04,3.5E-05,5.6E-04,1.4E-02,4.5E-03,0.8487,16.48,0.0993,16.92,0.51,0.0618,19.11,1.004,0.55,0.007,20.06,3.155,1.00,
,080528_FK13_79_a,2.4E-06,1.2E-04,6.1E-06,1.2E-04,1.7E-02,1.3E-02,0.0473,81.12,0.0070,51.11,0.32,0.0501,30.83,1.000,3.02,0.001,100.92,1.229,2.02,
,080528_FKB2_FK13_01_a,#DIV/0!,7.5E-05,4.3E-06,7.5E-05,1.2E-02,8.6E-03,0.0523,107.50,0.0070,26.14,0.12,0.0564,132.17,1.005,4.03,0.002,105.82,1.361,0.92,
,080528_FKB2_FK13_07_a,3.1E-06,7.4E-05,4.0E-06,7.4E-05,1.1E-02,8.3E-03,0.0516,33.34,0.0073,12.42,0.19,0.0513,28.86,1.002,0.45,0.002,17.10,1.332,1.67,
,080528_FKB2_FK13_08_a,3.2E-06,1.4E-04,7.5E-06,1.4E-04,2.4E-02,1.6E-02,0.0489,69.96,0.0071,8.53,0.06,0.0494,71.07,1.002,1.36,0.002,19.79,1.515,1.49,
,080528_FKB2_FK13_09_a,3.1E-06,8.1E-05,6.0E-06,8.1E-05,2.0E-02,9.0E-03,0.0728,16.67,0.0072,7.67,0.23,0.0746,17.22,1.006,0.45,0.001,15.32,2.242,1.25,
,080528_FKB2_FK13_10_a,3.8E-06,7.5E-05,3.7E-06,7.5E-05,6.6E-03,8.5E-03,0.0479,21.51,0.0071,4.23,0.10,0.0492,20.26,1.007,0.76,0.004,11.30,0.771,1.50,
,080528_FKB2_FK13_11_a,3.1E-06,1.4E-03,8.3E-05,1.4E-03,1.1E-02,1.2E-02,0.7017,3.90,0.0874,3.48,0.45,0.0581,1.56,1.006,0.21,0.036,7.28,0.927,1.27,
,080528_FKB2_FK13_12_a,3.8E-06,1.6E-03,9.5E-05,1.6E-03,4.7E-03,1.4E-02,0.7549,2.86,0.0943,2.50,0.44,0.0580,1.55,1.005,0.34,0.106,5.25,0.341,1.05,
,080528_FKB2_FK13_13_a,3.4E-06,8.7E-05,3.7E-06,8.7E-05,1.3E-02,9.9E-03,0.0420,14.90,0.0072,2.23,0.07,0.0422,14.43,0.999,0.22,0.002,7.54,1.265,1.28,
,080528_FKB2_FK13_15_a,3.2E-06,4.0E-05,2.5E-06,4.0E-05,5.9E-03,4.5E-03,0.0585,33.04,0.0072,7.15,0.11,0.0609,32.68,0.996,1.00,0.002,14.62,1.319,1.10,
,080528_FKB2_FK13_17_a,3.7E-06,1.8E-03,1.1E-04,1.8E-03,5.2E-02,1.3E-02,0.9107,2.71,0.1084,3.34,0.62,0.0608,1.99,0.997,0.20,0.010,10.31,3.879,1.13,
,080528_FKB2_FK13_18_a,3.7E-06,2.5E-03,1.5E-04,2.5E-03,3.0E-02,2.6E-02,0.6023,6.89,0.0756,6.82,0.49,0.0578,1.15,1.007,0.19,0.024,11.06,1.153,1.72,
,080528_FKB2_FK13_19_a,#DIV/0!,2.0E-04,9.3E-06,2.0E-04,2.5E-02,2.2E-02,0.0437,36.67,0.0070,23.07,0.31,0.0452,17.89,1.005,0.53,0.002,77.54,1.136,1.27,
,,,,,,,,,,,,,,,,,,,,,
,LamTool-U-Th-Pb            ver: 090128,BLANK CORRECTED INTENSITIES (in V),,,,,,STANDARD CORRECTED RATIOS,,,,,,,,,,,,,
,File name,204Pb,206Pb,207Pb,208Pb,232Th,238U,"207Pb
235U",2RSE (%),"206Pb
238U",2RSE (%),Rho,"207Pb
206Pb",2RSE (%),"208Pb
206Pb",2RSE (%),"208Pb
232Th",2RSE (%),"232Th
238U",2RSE (%),
(a),080528_FKB2_FK14_09_a,3.6E-06,1.8E-04,8.6E-06,1.8E-04,1.8E-02,1.9E-02,0.0558,7.98,0.0084,2.31,0.14,0.0480,7.64,0.984,0.20,0.003,4.35,0.917,1.17,
(b),080528_FKB2_FK14_13_a,#DIV/0!,6.9E-05,3.9E-06,6.9E-05,1.1E-02,7.6E-03,0.0545,78.06,0.0073,57.16,0.37,0.0525,72.12,0.998,1.66,0.002,49.36,1.377,1.27,
(c),080528_FKB2_FK14_05_a,#DIV/0!,1.8E-04,8.9E-06,1.8E-04,3.9E-02,2.0E-02,0.0556,11.96,0.0081,9.01,0.38,0.0495,9.19,0.987,0.45,0.001,19.51,1.947,1.21,
(d),080528_FK14_S21_a,#DIV/0!,3.1E-04,1.4E-05,3.1E-04,8.4E-02,3.4E-02,0.0483,76.97,0.0072,24.21,0.16,0.0485,95.91,1.006,5.20,0.001,57.83,2.488,1.89,
(e),080528_FK14_07_a,2.9E-06,1.6E-04,7.4E-06,1.6E-04,4.9E-02,1.9E-02,0.0424,80.77,0.0070,32.59,0.20,0.0426,55.56,1.000,2.07,0.001,140.01,2.592,1.23,
(f),080528_FK14_28_a,3.1E-06,2.7E-04,1.3E-05,2.7E-04,4.7E-02,3.0E-02,0.0499,15.51,0.0073,10.86,0.35,0.0488,11.07,1.000,0.33,0.001,24.74,1.562,1.14,
(g),080528_FK14_30_a,#DIV/0!,2.7E-04,9.8E-06,2.7E-04,1.1E-01,3.0E-02,0.0405,30.35,0.0074,4.17,0.07,0.0385,27.74,0.995,0.64,0.001,7.91,3.852,1.12,
(h),080528_FK14_38_a,4.6E-06,2.1E-04,1.0E-05,2.1E-04,8.2E-02,2.4E-02,0.0497,28.05,0.0070,16.58,0.30,0.0511,37.26,1.003,1.87,0.001,18.57,3.481,1.04,
(i),080528_FK14_50_a,#DIV/0!,2.3E-04,1.1E-05,2.3E-04,8.2E-02,2.6E-02,0.0466,21.52,0.0071,7.87,0.18,0.0470,22.51,1.004,0.66,0.001,65.21,3.097,1.28,
(j),080528_FKB2_FK14_02_a,3.4E-06,1.3E-04,7.1E-06,1.3E-04,2.1E-02,1.5E-02,0.0567,19.44,0.0076,20.74,0.53,0.0539,20.50,0.988,0.59,0.002,26.70,1.426,1.19,
,080528_FK14_02_a,#DIV/0!,1.0E-04,5.6E-06,1.0E-04,2.3E-02,1.2E-02,0.0413,151.10,0.0070,13.58,0.04,0.0415,143.44,0.990,1.68,0.001,126.08,1.941,1.30,
,080528_FK14_27_a,3.8E-06,8.2E-05,5.5E-06,8.2E-05,1.7E-02,9.3E-03,0.0667,28.53,0.0070,4.36,0.08,0.0684,29.78,0.999,0.27,0.001,8.25,1.848,1.13,
,080528_FK14_33_a,3.8E-06,1.4E-04,7.8E-06,1.4E-04,5.8E-03,1.5E-02,0.0524,7760.78,0.0067,6540.40,0.42,0.0565,537.95,0.995,37.30,0.009,11692.81,0.380,0.91,
,080528_FK14_S_05_a,#DIV/0!,1.1E-04,4.4E-06,1.1E-04,1.6E-02,1.2E-02,0.0464,538.36,0.0079,158.04,0.15,0.0407,297.68,1.000,2.09,0.002,79.90,1.400,1.12,
,080528_FK14_S10_a,#DIV/0!,1.4E-04,6.0E-06,1.4E-04,3.0E-02,1.5E-02,0.0455,780.10,0.0071,552.54,0.35,0.0450,663.17,1.006,45.32,0.001,271.70,1.927,1.09,
,080528_FK14_S12_a,#DIV/0!,8.6E-05,4.1E-06,8.6E-05,3.4E-02,9.5E-03,0.0432,640.15,0.0072,62.30,0.05,0.0433,595.83,1.002,1.49,0.001,27.67,3.519,1.00,
,080528_FK14_S22_a,#DIV/0!,2.0E-04,7.8E-06,2.0E-04,2.5E-02,2.3E-02,0.0381,60.27,0.0072,23.09,0.19,0.0383,31.30,0.997,2.22,0.002,16.91,1.088,1.01,
,080528_FK14_S26_a,#DIV/0!,1.6E-04,8.8E-06,1.6E-04,2.4E-02,1.7E-02,0.0579,102.66,0.0075,167.21,0.81,0.0580,175.31,1.003,4.90,0.002,118.96,1.384,0.96,
,,,,,,,,,,,,,,,,,,,,,
,LamTool-U-Th-Pb            ver: 090128,BLANK CORRECTED INTENSITIES (in V),,,,,,STANDARD CORRECTED RATIOS,,,,,,,,,,,,,
,File name,204Pb,206Pb,207Pb,208Pb,232Th,238U,"207Pb
235U",2RSE (%),"206Pb
238U",2RSE (%),Rho,"207Pb
206Pb",2RSE (%),"208Pb
206Pb",2RSE (%),"208Pb
232Th",2RSE (%),"232Th
238U",2RSE (%),
(a),080521_FK15_103_a,3.3E-06,6.9E-04,2.7E-05,6.9E-04,6.1E-02,6.3E-02,0.0488,5.06,0.0075,5.37,0.53,0.0472,1.89,0.999,0.08,0.003,10.06,0.960,1.38,
(b),080521_FK15_114_a,3.1E-06,2.4E-04,9.6E-06,2.4E-04,1.4E-02,2.2E-02,0.0502,9.70,0.0077,4.82,0.25,0.0475,7.28,1.000,0.09,0.005,20.04,0.650,1.28,
(c),080521_FK15_091_a,3.3E-06,9.0E-05,3.9E-06,9.0E-05,5.1E-03,8.3E-03,0.0519,18.27,0.0075,4.47,0.12,0.0510,14.99,0.997,0.16,0.005,6.39,0.623,1.18,
(d),080521_FK15_095_a,#DIV/0!,1.9E-04,7.0E-06,1.9E-04,2.1E-02,1.8E-02,0.0488,11.33,0.0074,6.81,0.30,0.0473,12.17,1.000,0.17,0.002,34.89,1.191,1.30,
(e),080521_FK15_001_a,2.4E-06,7.0E-05,3.1E-06,7.0E-05,1.5E-02,6.9E-03,0.0552,58.12,0.0075,42.15,0.36,0.0533,83.84,0.999,0.60,0.001,65.59,2.133,0.92,
(f),080521_FK15_006_a,2.8E-06,1.7E-04,7.3E-06,1.7E-04,1.8E-02,1.6E-02,0.0543,26.27,0.0076,18.46,0.35,0.0530,25.82,1.000,0.35,0.003,92.13,1.130,2.26,
(g),080521_FK15_010_a,3.6E-06,1.0E-04,4.0E-06,1.0E-04,1.5E-02,9.3E-03,0.0511,58.19,0.0079,19.16,0.16,0.0472,59.86,0.997,0.84,0.001,458.27,1.570,1.52,
(h),080521_FK15_016_a,2.5E-06,3.8E-04,1.5E-05,3.8E-04,3.6E-02,3.4E-02,0.0496,5.99,0.0077,3.54,0.30,0.0453,3.99,0.997,0.10,0.002,39.67,1.051,1.72,
(i),080521_FK15_022_a,#DIV/0!,3.0E-04,1.2E-05,3.0E-04,2.4E-02,2.7E-02,0.0532,8.70,0.0079,5.85,0.34,0.0478,4.58,1.000,0.10,0.003,18.75,0.894,1.10,
(j),080521_FK15_025_a,#DIV/0!,3.7E-04,1.4E-05,3.7E-04,3.9E-02,3.4E-02,0.0456,6.15,0.0075,4.45,0.36,0.0436,2.88,0.998,0.06,0.002,16.53,1.125,1.52,
(k),080521_FK15_028_a,2.7E-06,1.4E-04,5.6E-06,1.4E-04,1.7E-02,1.3E-02,0.0481,40.21,0.0075,20.00,0.25,0.0471,16.69,0.998,0.24,0.002,22.41,1.270,1.44,
(l),080521_FK15_046_a,#DIV/0!,3.1E-04,1.3E-05,3.1E-04,2.8E-02,2.9E-02,0.0529,18.21,0.0079,18.03,0.50,0.0490,15.37,0.999,0.28,0.003,36.69,0.966,1.41,
(n),080521_FK15_054_a,#DIV/0!,9.6E-05,3.5E-06,9.6E-05,7.9E-03,9.0E-03,0.0466,13.92,0.0073,7.50,0.27,0.0446,13.81,1.000,0.09,0.003,8.68,0.877,1.08,
(o),080521_FK15_149_a,3.1E-06,7.2E-04,2.8E-05,7.2E-04,5.6E-02,6.5E-02,0.0501,9.91,0.0078,10.96,0.55,0.0465,5.01,1.002,0.21,0.004,38.82,0.869,1.53,
(o),080521_FK15_149_b,3.0E-06,1.1E-04,4.4E-06,1.1E-04,9.3E-03,1.1E-02,0.0487,17.02,0.0073,8.11,0.24,0.0474,16.57,1.004,0.16,0.003,25.13,0.887,1.33,
(p),080521_FK15_132_a,#DIV/0!,5.8E-04,2.3E-05,5.8E-04,4.0E-02,5.3E-02,0.0482,5.70,0.0074,5.55,0.49,0.0467,2.33,1.002,0.08,0.004,9.07,0.750,1.40,
(q),080521_FK15_107_a,#DIV/0!,2.1E-04,7.9E-06,2.1E-04,2.8E-02,1.9E-02,0.0471,7.30,0.0079,4.85,0.33,0.0440,4.01,0.999,0.06,0.002,4.68,1.471,1.03,
,080521_FK15_003_a,#DIV/0!,1.9E-04,8.0E-06,1.9E-04,3.7E-02,1.8E-02,0.0556,111.26,0.0076,59.32,0.27,0.0527,153.35,0.999,3.33,0.001,198.67,2.051,0.93,
,080521_FK15_005_a,#DIV/0!,1.0E-04,4.7E-06,1.0E-04,2.2E-02,9.9E-03,0.0533,187.16,0.0073,21.23,0.06,0.0520,190.21,0.998,0.75,0.001,77.96,2.228,1.47,
,080521_FK15_007_a,#DIV/0!,9.2E-05,3.2E-06,9.2E-05,1.6E-02,8.8E-03,0.0437,435.46,0.0082,706.64,0.81,0.0407,739.21,0.995,1.64,0.002,305.36,1.784,1.53,
,080521_FK15_011_a,#DIV/0!,9.7E-05,3.8E-06,9.7E-05,7.3E-03,9.0E-03,0.0486,275.78,0.0076,195.65,0.35,0.0444,174.62,0.996,2.15,0.003,195.99,0.811,0.98,
,080521_FK15_012_a,#DIV/0!,8.1E-05,3.0E-06,8.1E-05,1.1E-02,7.4E-03,0.0510,155.56,0.0080,85.84,0.28,0.0469,315.99,0.998,4.40,0.003,791.22,1.425,1.87,
,080521_FK15_014_a,#DIV/0!,1.3E-04,4.5E-06,1.3E-04,1.4E-02,1.2E-02,0.0457,105.98,0.0080,98.98,0.47,0.0414,81.43,0.997,4.37,0.003,387.07,1.155,1.33,
,080521_FK15_029_a,#DIV/0!,4.4E-05,2.5E-06,4.4E-05,7.1E-03,4.3E-03,0.0682,117.14,0.0069,120.56,0.51,0.0711,67.61,1.001,2.69,0.002,84.43,1.654,0.86,
,080521_FK15_038_a,#DIV/0!,4.4E-05,2.8E-06,4.4E-05,4.8E-03,4.1E-03,0.0764,2285.01,0.0077,846.35,0.19,0.0700,2445.09,0.999,53.32,0.002,1282.24,1.164,0.86,
,,,,,,,,,,,,,,,,,,,,,
,LamTool-U-Th-Pb            ver: 090128,BLANK CORRECTED INTENSITIES (in V),,,,,,STANDARD CORRECTED RATIOS,,,,,,,,,,,,,
,File name,204Pb,206Pb,207Pb,208Pb,232Th,238U,207Pb235U,2RSE (%),206Pb238U,2RSE (%),Rho,207Pb206Pb,2RSE (%),208Pb206Pb,2RSE (%),208Pb232Th,2RSE (%),232Th238U,2RSE (%),
(a),080528_FKB2_FK31_07_a,4.0E-06,7.6E-05,4.8E-06,7.6E-05,1.2E-02,8.6E-03,0.0484,47.41,0.0072,22.12,0.23,0.0485,36.32,0.995,0.79,0.002,75.14,1.412,1.38,
(b),080528_FKB2_FK31_13_a,#DIV/0!,1.5E-04,8.1E-06,1.5E-04,2.2E-02,1.7E-02,0.0505,18.29,0.0077,5.16,0.14,0.0479,17.14,0.992,0.46,0.002,23.26,1.296,1.53,
(c),080528_FKB2_FK31_14_a,4.5E-06,5.9E-04,2.8E-05,5.9E-04,9.0E-02,6.3E-02,0.0510,7.02,0.0081,4.75,0.34,0.0452,7.62,0.979,0.87,0.002,19.55,1.432,1.36,
(d),080528_FK31_125_a,3.3E-06,2.0E-04,1.1E-05,2.0E-04,8.0E-02,2.3E-02,0.0515,46.39,0.0076,52.01,0.56,0.0477,90.31,0.995,2.19,0.001,108.49,3.447,0.87,
(e),080528_FK31_02_a,3.5E-06,1.1E-04,5.6E-06,1.1E-04,1.1E-02,1.2E-02,0.0495,37.34,0.0071,22.43,0.30,0.0496,42.02,1.001,0.42,0.001,71.60,0.943,1.49,
(f),080528_FK31_105_a,#DIV/0!,1.5E-04,8.2E-06,1.5E-04,1.8E-02,1.7E-02,0.0512,39.35,0.0075,9.79,0.12,0.0495,35.07,0.997,2.23,0.002,93.95,1.046,1.79,
(g),080528_FK31_13_a,3.2E-06,5.4E-04,2.8E-05,5.4E-04,7.2E-02,6.0E-02,0.0538,5.20,0.0079,3.42,0.33,0.0495,6.53,0.994,0.30,0.001,6.00,1.190,1.52,
,080528_FK31_08_a,#DIV/0!,4.2E-05,9.1E-06,4.2E-05,6.6E-03,4.2E-03,0.2645,43.70,0.0089,29.51,0.34,0.2196,34.17,0.998,0.54,0.001,51.96,1.589,0.96,
,080528_FK31_112_a,#DIV/0!,1.2E-04,7.8E-06,1.2E-04,1.6E-02,1.4E-02,0.0604,26.74,0.0072,18.20,0.34,0.0598,31.91,1.000,1.98,0.002,90.16,1.134,1.29,
,080528_FK31_113_a,#DIV/0!,7.1E-05,4.1E-06,7.1E-05,1.1E-02,8.2E-03,0.0642,153.21,0.0075,6.46,0.02,0.0623,153.90,0.997,2.80,0.002,14.39,1.364,1.40,
,080528_FK31_117_a,#DIV/0!,2.8E-03,1.7E-04,2.8E-03,1.2E-02,2.8E-02,0.6745,54.54,0.0857,49.95,0.46,0.0568,5.77,0.996,2.92,0.055,291.32,0.412,1.59,
,080528_FK31_118_a,#DIV/0!,7.8E-05,3.6E-06,7.8E-05,1.3E-02,9.1E-03,0.0447,61.24,0.0072,25.32,0.21,0.0405,105.31,0.993,2.95,0.001,60.65,1.416,1.53,
,080528_FK31_124_a,#DIV/0!,7.8E-05,4.4E-06,7.8E-05,1.2E-02,9.3E-03,0.0554,80.60,0.0072,52.68,0.33,0.0543,32.73,1.003,0.51,0.002,47.56,1.277,1.47,
,080528_FK31_143_a,#DIV/0!,1.0E-04,5.1E-06,1.0E-04,2.6E-02,1.2E-02,0.0490,17.56,0.0072,11.39,0.32,0.0493,14.07,1.001,0.21,0.001,12.65,2.177,1.06,
,080528_FK31_143_b,3.0E-06,7.7E-05,4.8E-06,7.7E-05,1.3E-02,8.9E-03,0.0585,34.55,0.0071,13.77,0.20,0.0596,37.07,1.003,0.36,0.002,31.96,1.440,1.97,
,080528_FK31_145_a,#DIV/0!,9.3E-05,5.2E-06,9.3E-05,1.5E-02,1.1E-02,0.0538,343.15,0.0073,216.61,0.32,0.0533,416.87,0.999,17.62,0.002,3860.56,1.411,1.02,
,080528_FK31_15_a,#DIV/0!,3.0E-04,1.5E-05,3.0E-04,7.0E-02,3.4E-02,0.0467,4.04,0.0075,2.54,0.31,0.0453,3.36,0.994,0.10,0.001,6.87,2.030,1.15,
,080528_FK31_156_a,4.3E-06,3.5E-04,1.7E-05,3.5E-04,5.7E-02,4.0E-02,0.0479,81.83,0.0076,63.64,0.39,0.0464,50.24,1.004,1.07,0.002,100.08,1.421,0.85,
,080528_FK31_157_a,3.0E-06,2.2E-04,1.2E-05,2.2E-04,2.4E-02,2.5E-02,0.0477,96.71,0.0070,82.26,0.43,0.0494,29.23,1.008,3.03,0.003,148.50,0.946,1.58,
